# Supplementary material for: Fgf-signaling is compartmentalized within the mesenchyme and controls proliferation during salamander limb development
Source: eLife. 2019 Sep 20;8:e48507. doi: 10.7554/eLife.48507 (PMC6754229; doi:10.7554/eLife.48507)
Supplement: Supplementary file 1. — The excel file contains gene names, source/NCBI accession id, full length/partial coding sequences and ids, human hit, e-value for human hit, forward primer sequence, reverse primer sequence and length of antisense probe used. [file elife-48507-supp1.xlsx]

## Sheet: Sheet1
	Gene name	Source/NCBI accession id	Full length/partial coding sequences and ids	Human hit	e-value for human hit	Forward primer	Reverse primer	Length of antisense probe
1	Sox9	AY894689.1	>AY894689.1 Ambystoma mexicanum sox9 (sox9) mRNA, partial cds AGCCCTTTCAACCTGCAGCAGCACTACAACGCCACCTACCCCACCATCACGCGCGCCCAGTACGACTACACCGACCACCAGAGCTCTAACAGCTACTACAGCCACGCTGCGGGTCAGAGCTCAAGCCTGTACTCTACCTTCTCCTACATGAACCCCACACAGCGCCCCATGTACACCCCTATCGCAGACACGACGGGCGTCCCCTCCATCCCGCAGACCCACAGCCCCCAGCACTGGGAGCAGCCAGTCTACACACAGCTCACCAGGCCCTAGAGGCTGCAAGCTGCCCTGCAGACTTTGAAGACACTTAAGTCGGCCATCTTGGTTACCGGCCATG…	BC056420.2	2e-73	AGCCCTTTCAACCTGCAGC	GGCTTTCCTTTCCAGTCTTTGTG	510 bp
2	Msx2	www.axolotl-omics.org	AMEXTC_0340000063635. Msx2 protein (Msx2) CGGAGCTGCGAGAGGAGGCAGAGCAGGGCCAGCGAGGTTTAAGACTGGCTTTTCCCGTGGCTGTGAAAACGCAGGGGATTTTTGGGGGGGTTCCTGGAAGGATTCGGGACTCTCTCCCCTCCGCAAGCCGTGAGGATGATGATGGTGCGCTCTTCTGCTGACAAGGAGGACTTCTCCTCCGACGAGGAGTGCAGCCCCGCGCCGGCGCCCCCCAGCGCAGACCCCAAAGTCAGGGTGTCCAGCTTGCCCTTCTCCGTGGAGGCGCTCATGGCCGACAAGAGGTGCTCGTCTCAAGGGGTCCCGCACGCCCCCGGGGGCGCGCCCCTCCGCCGGTGCAGCAGCTACCGTTCCGCGGGG…	>NM_001363626.2	4e-100	GCTGGAGAAGCTCAAAATGG	TATCGACCACAACGGTGAAA	1256 bp
3	Krt5	JQ982506.1. The plasmid was a gift from Satoh lab (Okayama University, Japan) used in Moriyasu et al., 2012	>JQ982506.1 Ambystoma mexicanum keratin 5 mRNA, partial cds TCTCACTTGGAGGTGGCAGCAGCCTGCGATACGGATCTGGTGGAGGAGCTGGTGCTGGGTTTGGTGGTGGTGCTGGGTATGGGTTTGGTGGAGGCGCTGGGTTTGGTGGAGGAGCAGGTGCTGGATTTGGTTCTGGTGGCGGGTATGGAGTAGGCGGAGGATCTTTTGGGATGGGTGGAGGTCCGGGGTTCCCCGTTTGCCCACCTGGTGGTATCAAAGAGGTCACCATCAACCAGAGCCTCCTTTCCCCACTCAACCTGGAAATTGACCCCACCATCCAGAGGGTGCGAACAGAAGAAAGGGAGCAGATCAAGACCCTCAACAACAAATTCGCCTCTT…	NM_000424.4	2E-39	TCTCACTTGGAGGTGGC	TGCTAGAGCTAACCACGGAG	1287 bp
4	Krt17	JQ982507.1. The plasmid was a gift from Satoh lab (Okayama University, Japan) used in Moriyasu et al., 2012	>JQ982507.1 Ambystoma mexicanum keratin 17 mRNA, partial cds CACTCTGGATAATGCCAGGACTCTGCTGCAGATCGACAACGCCAAGCTGGCAGCTGATGACTTCAGGAACAAGTACGAGACTGAGCTGGGCCTGCGAATGAGCGTGGAGGCCGACATCAATGGGCTGCGCAGGGTGCTGG ATGACCTGACCCTGGCCAGATCAGACATGGAGATCAATATTGAGAGTCTGAAGGAGGAGCTGGCCTACCTCAAGAAGAACCACGAGGAGGAGATGAACGCCCTGCGCGGCCAAGTCGGCGGGCAGGTCAACGTTGAGATGGACGCGGCTCCAGCCACAGACCTCAGCAAGATCCTGTCTGATATGAGATCTCAGTAC…	>NM_000422.3	3e-178	CACTCTGGATAATGCCAGGA	ACTGCGAACCAGAGAAGAT	1276 bp
5	Shh	KX809594.1 The antisense probe was a gift from Tanaka lab (IMP, Austria)	>KX809594.1 Ambystoma mexicanum sonic hedgehog (Shh) mRNA, complete cds ACAAGCGTCCCTAGCTTGGCAGCTTCCATTAAAATCACATCCCTGTTTCTTTTTTGTGTTTTGTTTTTTGGTTGCCTCCTGATCGCGGCCTTGACACCCGCCTCCGATGTGGTCAGCTGGCGGCGACCTCCACGCCTGCTCTGGTAGGGACCAGTGGACCTCGCAGCGCTGATCCGAGAGCAGCCCAGGGGGACCCGGGAGCCAGGGAGAAAGGAGCGGTGCTGTTTGCGGAGGGCAGCCGGGAGTGCTCCATGGGCGAGATGCGGCTACTGCTCAGGCGGCTACTGCTCGGGACCCTGGTCTGGGCCCTCCTGGTCCCTTCCGGGC…	NM_000193.3	0	-	-	~1000 bp
6	Ptch1	AY887138.1	>AY887138.1 Ambystoma mexicanum patched-1 (ptc1) mRNA, partial cds GAGCTGTGGGTGGAAGTTGGTGGACGAGTGAGTCGGGAATTAAATTACACGCGCCAGAAGATTGGAGAAGAGGCCATGTTTAATCCCCAACTCATGATCCAGACACCTAGAGAAGATGGTGCTAATGTGCTCACGGCTGATGCGCTGCGGCAGCACCTCCAATCTGCACTGGATGCCAGCAGGGTCCAAGTCTACATGTACAACAGACAATGGAAATTGGAACAGTTATGCTATAAATCGGGAGAACTGATCACAGAAGCTGGCTATGTAAACCACATTATTGAATCTCTTTATCCGTGTTTGGTTATCACACCTTTGGACTGTTTCTGGGA…	NR_149061.1	0	GATCACAGAAGCTGGCTATGTAAAC	AAATATCAAGTCTGCAATCTTCGCG	1208 bp
7	Gli1	Bryant et al., 2017	>c1076293_g2_i2 GGCCCAGTACATGCTGGTGGTGCATATGCGGCGTCACACGGGGGAGAAGCCACACAAGTGCACATTTGAGGGCTGCAACAAGGCCTACTCCCGGCTGGAGAATTTGAAGACTCATCTACGCTCTCACACGGGCGAGAAGCCCTATGTCTGCGAGCATGAAGGGTGCAACAAGGCCTTCTCCAATGCCTCCGACCGAGCCAAGCACCAGAATCGGACACACTCTAACGAGAAACCCTATGTGTGCAAGATCCCCGGCTGTACGAAGAGGTACACAGACCCCAGCTCCCTACGCAAGCACGTGAAAACCGTGCACGGGCCGGAGGCACACATCACCAAGAAGCACCGAGGGGACAGCATCACGAGGAGCCTGGGGGCGCCGGACG…	XM_006712422.3	1e-102	GTTCATAAGAGACCAGACATTGTGG	CATACAAAAACAGAGGCACATGTGA	1243 bp
8	Gli3	KU882017.1 The plasmid was a gift from Tanaka lab (IMP, Austria)	>KU882017.1 Ambystoma mexicanum gli3 (gli3) mRNA, partial cds ATCATTAATAAAGAAGGAGATCCATGCATCCATATCGCACCTTCACGAGCATGCCCTGCCGTACCGAGGTGCGCTCTTTGCGATGGACCCAAGGAATGGCTACATGGAACCTCATTACCATCCGCCTCCCTTTTTCCCAGCCTTCCATCCCCCAGTACCAATTGACGCAAGACACCACGAGGGACGATACCATTACGAACCAACGCCCATTCCACCGCTGCATATGCCTTCAGCATTGTCGAGTAGCCCAACCTATTCAGACCTTCCCTTCATCCGGATTTCGCCTCACAGAACTCACGGGGCCTCCGAGTCTCCTTTCAGCCCTCCTCATCCGTAT…	NM_000168.5	6e-40	ATCATTAATAAAGAAGGAGATCCA	ATAGGTCTCTGGGTAGGAAAAG	933 bp
9	Ihh	Bryant et al., 2017	>c1089300_g2_i3 CAAAGACGGAGCTGGTACCATCCCCGCGCCCCCGCCACAGCATCCTGGGGCCAGCCTCCTCCAGCCGGAAAGGACATTGGTCGTGAGGCCATCCTCCAGCCCACGTGGGGTGAGGCTTGTCCCAGGCTGGAGTCTTATTTGGAGTCCATCTGAGGAACCCCCCGAGAAGCCGGCAGGACCCACGGCCGGACGCCCCGGAGGAGACCTGGATCTGCGAGACACGAGGAAGGACCAGCATTCAGCCAGAGGCCACGGGGGGCCCTCCATCTGCACGGGGGATTTAATCCTGACACGCCGAGGAACCACGCGCCTCCTGCGCAGCCATCGCACCTCAGCACTACCTGCGCGCCCGAGGAGCCGCACCTGACCACCCAGCGCACCCC…	NM_002181.3	0	TAGTGTAGGTAGAGGGAAACCACCT	GTCCTGTTTTTGCTTGGAAATC	1228 bp
10	Fgf8	KU882019.1 The plasmid was a gift from Tanaka lab (IMP, Austria)	>KU882019.1 Ambystoma mexicanum fibroblast growth factor 8 (fgf8) mRNA, complete cds TTCACGTGCCTCACCTCCACTACCTCAGCAGCAGGCTGTGCGAGGGTCTGTAGGTGCTCGCCCTTGGGACCCTTGCATCTTGCCTGCGGCCCGTGATCCAAGGTGGCAATGTTGCCACTAAGCTAGTGCTTCGCAGAGGAGACACGCGTGGAAGCGGTTTATGCAGAACAGGGGTGCTACTGGAGGACAGGCGCTTTATGCCGGGTAACGATCCGTAAAGCGCCCTTCGGGGACTTCCCATTTGCAGACAAGACATCGCTCCAGCAAGGGGTTTATTCACGGGCAGCAGCGCTTCTGCGAGCGATCTAGAGAGA…	NM_006119.4	7e-153	TTCACGTGCCTCACCTCCACTACCTCAGCA	ATATAAATTGTTCTTCTAAAAGTCCACTGG	1,148 bp
11	Gremlin1	KU882015.1	>KU882015.1 Ambystoma mexicanum gremlin 1 mRNA, complete cds TTCGCCTGACACTACATAGCGCCCAGAAGCAGAGAATCCGGATTGGCCCCGGGAGCCCGCGGGACACCCAGAATACTGAGCACGGGGAGCTAGCTGTTCCACCCACCCACTCAACAGGATGTTTCGATTGGTCTACGCAGTTGGCGCCCTTCTCCTGCTCTACGGGCTGATGCTCCCTGTGGCAGAGGGAGAAAAGAAAACACGAGGGTCTCAGGGAGCCATCCCACCACCCGACAAGGCACAGCCCAATGACTCTGAGCAGACCCAGCAGCAGCCCCCAGGTGGCCGGGCGCGGGGGCGAGGAAAAGGCACAGCCATGCCTGCCGAGGAGGTGCTGG…	NM_013372.6	5e-82	TCGCCTGACACTACATAGC	AGATGTGCAAAAGTTCAGAGAT	937 bp
12	Etv1	Bryant et al., 2017	>c1081142_g1_i1 CATTACACCACCATTGAAGCACCATTTCGTCGGAGCGCGTCCCAAGTGAGGGCGTTTGTTGGGTGGTGGGTAGAGGGGTGTTTCTAATTGAGTCCCGTGGATCCCCGAGTTTAAATGCCCTTAGAATGGGCACCCTACACAACTAGTACCAGCCACGGGACCCGAGCAGGATGTTTGACCCTACGGTCATTTGAGGGAAGTTGCAGGCAGTGTTTACGTAAAAACCGTTGGGGTCAGTGGCTCGGTGCGCTTATGTTTTATGTGCAGGGGCAGGGAAAGTTCAAGCTCCCCCGGGGCCTTCTCGCGGTGCCACAACAGAGCGCCCCCCCCTCCCCAGGGAGGAAGAGGTGGCCAAGCCCGGGGAGCCATTGTTTTTCTTATCG…	XM_011515170.3	0	CTTTCTCAAAAGCCTATGAAGTGCC	GGAAATCAGCTGCCAGATTTATTGA	1208 bp
13	Etv4	Bryant et al., 2017	>c1073130_g1_i7 GGTTAGCGGTGAACTGGCCTGGGTGTCCCCCATGGGTAGGGCACCCCTCCAACGTCGAGGCTGCTTCGGGGCGTCGCGCCGCGAGACTTCTGCGTCCCCCTTTGCTGATCAAGCATTGGAAGTTGGTGCCACTGTGCTGGCCGCACAGGGCCAGGGGGGAGTGCATGGGGGCTGCTGGAGTTGCAGGAAACGAGCACAATGCATTGAAAATATGGCCCAGCTGGGGCATTTGGGGAGAGGCGTGCGCGACTGGACGCTATTTTGAGAAACGTCCCACAATGCATCCCCTGCAGAGCGCAGGGCATATAGCGTGGCTCTCGGCATGCGCACCTAATTGCACGCTTCTGGCGAGCGAATGCAAACATCGAGTGCCCATTAGGTGG…	NM_001079675.2	2e-79	CCAGACAGGACAGAAACTTCATGA	TTAGGCCTGCAAAATGTATCGATTG	1278 bp
14	Hoxd11	AF031481.1	>AF031481.1 Ambystoma mexicanum homeobox transcription factor (Hoxd-11) mRNA, complete cds CCCTTCCTCCATGCACTGAAACCTCCCGGCTGCCGGCAATCTCCAAAAAGCGAAGACATGACCGAGTTTGATGGCTGCAGCAACAGCGCGTCCAACATGTATCTGCCGGGATGCGCCTACTACGTCTCGCCCTCGGATTTTTCGTCGAAAACCTCGTTCCTCTCCCAGAGCTCCTCCTGTCCAATGACTTTCCCCTATTCTTCCAATATACCTCACGTGCAGCCTGTGCGGGAAATGGCGTTCCGGGAGTATGGGCTGGAGCGGAGTAAGTGGCAATACCGGGGGAGCTACTCCTCCTACTACCCGTC…	NM_021192.2	6e-32	CGTGTTTTTCTTGCTGGTTTTACAG	TTTTTAAATCTTCGTCGAGGTTCCC	1031 bp
15	Fgf9	KU882020.1	>KU882020.1 Ambystoma mexicanum fibroblast growth factor 9 (fgf9) mRNA, partial cds TCTTGCCTCTCTCTCCCGGGTTCATGCTGATGTTTGCAGTCTCCTACAGCGAGAGAAAGCGGCGCGTGCCTTCCTGGAGAAGAGGATGTGTGCATCCTGACGCAGCCTGCCCATCCGTAGAATAAGATTAACAGAAACCCGCCCGTGGGGCGAGAAGTTGCGATGGTCATTTTCACTTTGAACCAAATGGAGGAACTATGGATTTTTGCGCTTGTGGCCTCTGGGTGGGCTGAAGACCTCGCCGCCTGTTAGGAGCCGGGGGTACCTCTCCATTAGGATGTCAGTGCATCCGTGCTCAGCGGTGGTTCTTTAGAC…	NM_002010.2	3e-59	ATTAAACCCG CTTTGATTTCTTG	GTAGAGATTAGATG AGTATGTGTTA	972bp
16	Fgf10	KU882013.1	>KU882013.1 Ambystoma mexicanum fibroblast growth factor 10 (fgf10) mRNA, complete cds GAGGCCAGTTGGTGAACAGGGTTTTATTGTTTGGGTTAAGGACAGCCACCAAGGGTAACTGGGGGAGAGCCGCTCCCTGGAAGTGATTGGACCCCTGAGTAATGGATGTTGGTGCACTCTCTTCATCCGAGGTCCGAGCCCCGCGGGAGATAGGTGTCCGGCGGCCCCCCTCTTGCCTCCCACCAGTGAGCATCCTTCCAGCATGTTTCTTCTTGTGAGGCGTTCTCTGCTGCCGCGAGCTCCAGAACGATGTGCGAATGGGTACTGAGGAAGGGTGCCGCCGCCTTGTCCCAGCTGCCCTGCCTGGCGCTG…	NM_004465.1	6e-17	TTTATTGTTTGGGTTAAGGACAGCC	GTGTGATCCAAATGCTTCCAGTAAA	1245 bp
17	Fgf17	KU882014.1	>KU882014.1 Ambystoma mexicanum fibroblast growth factor 17 (fgf17) mRNA, complete cds. TCCGGTCACCGGATGCCCTGATGCCCATCTGAAATCACTGCACGACCAGAAAGGCGCCCCACCGCCCAGACGCAGGGGGGGGGGTTCCCTCCATCACCTGGACCGCGGGGAGGGCTGCGTGACCTGACTGTTCCCGGATCTACCCGCGGAGTTTCTTCACCATGGCTGCTCGAGGGCTCTTCGGCATCAAAATTTGGCTGCAGGTGCTCCTGCTCTGGGGGCAGACGGAATCCCAGGCAAAGCTGATTGTGGAGACAGACACCTTTGGGAGCCGTGTGCGAATCAAGGGCGCGGAGAGCGAAAAGTACATC…	NM_001304478.1	2e-77	CTCTTCGGCATCAAAATTTGGCT	AATTCCTGATCCTCTTCCTGGTATG	1179 bp
18	Fgfr1	www.axolotl-omics.org	AMEXTC_0340000263245 RecName: Full=Fibroblast growth factor receptor 1; Short=FGFR-1; AltName: Full=PFR1; Flags: Precursor (hypothetical) GGGGCGCCAGGCTGGGCGGGGAGTGCGGCCCGGGATGCGAGAGGGGGTGGGAGCCTTGGAAGTGATCCGAAGTCAGAGCTTGAGCAGCCGAGACGCCCTGTGGGAGGAGAGGAGCTGCTGGGACCGCTGGAGCGGAGGGGCGCACAGACCGCAGCGTCCCAGAGAAAGAGTGCACGAAGCCCTGAGAGGTTCGGGAGGGAGTCTGCAAGAGGCAGGGGGATTTCGGGAGGCCAGGCTGCCCCGGCGGAAGGATCGAGCCGA…	NM_001174067.1	0	GGAGAAACTTTTCGGACTTGACT	GATGGGAGATCCCAATAGAGTTAC	1234 bp
19	Fgfr2	www.axolotl-omics.org	AMEXTC_0340000124064 PREDICTED: fibroblast growth factor receptor 2 isoform X1 (FGFR2) (FGFR2)CTCGGAGAGAGCCGGTCCCTCAGTCCCCTGGAGCGCCTGCTTCATCTCTGGAAACTTTTGCCCAGCTCTGGAAACTTTGGCCGAACTCTGGAGAACTTTTTCCTCGAAGGCCCCCCAGTCGGAGCCTTTCTTTTTTTTTTGGAACCAGCCCTGGGATTTTGGCGCCCCCATGTTGGATGTGTGTTGGTAAAAGTGGCCGTGGACAGCTGTTGGCGGACCAACCTCTGGACGTGGGAGCCGGACACCTACCTCAGGAGTGGCCTGCCTTGGACCCCAGCACCCCTCAAATCTCTGTGCCCCAGACC…	NM_022970.3	0	AAGGAGTTCAAGCAGGAGCA	CACTTCTGCGATGCCAAGTA	1283 bp
20	Fgf4	Bryant et al., 2017	>c1228703_g1_i1 len=936 path=[1320778501:0-935] GCCCCGTTCTCTTTGAAAGGCATCTCTGAAAGACGTGCAGTGACTTTCCACGGGTCCTCTTGGGAAGCCGGCTCCGGGTTCCTTTTTCGCTTTGATCTATGTATAAGCGGAGCTGAGGGGAGGTATTTTTAGAGCCATTGACACCCCAGGCCACGTGTGCCCATGTTGACCAGGATGACTCTTGCACCGGCCTTGTTGCCAGTCGTGCTCCTGGGGCTGCTTTCGGGGCTTACGTGCTGTCATCCCGTGCCACCTTCGGGGAACGCCACCACGGAATGGCGGTGGGAGACGCTGTACTCCCGATCGCTCGCGCGAATGACTGCCGGGGAAAGGACGGAGACCCACCGCTAC…	NM_002007.4	2e-67	GAGGTATTTTTAGAGCCATTGACAC	AAGACTCGTAGGCATTGTAGTTGTT	527 bp
