# Supplementary material for: Fgf-signaling is compartmentalized within the mesenchyme and controls proliferation during salamander limb development
Source: eLife. 2019 Sep 20;8:e48507. doi: 10.7554/eLife.48507 (PMC6754229; doi:10.7554/eLife.48507)
Supplement: Supplementary file 2. — The excel file contains gene expression analysis for Figure 2—figure supplement 3D and DMSO/SU5402 and ethanol/cyclopamine drug experiments. [file elife-48507-supp2.xlsx]

## Sheet: Anterior-posterior genes
Figure 2- figure supplement 3
Shh	Treatment	Replicate number	Ct Shh	Ct Tubulin alpha	ΔCt (Ct of Shh - Ct of Tubulin alpha)	SD	SEM
	St 46 A	n1 mean	34.17	24.265	9.905	0.130815	0.0925
		n2 mean	32.775	22.685	10.09
	St 46 P	n1 mean	34.76	24.12	10.64	0.972272	0.6875
		n2 mean	34.855	22.84	12.015
	St 47 A	n1 mean	35.675	26.18	9.495	1.03238	0.73
		n2 mean	35.32	27.285	8.035
	St 47 P	n1 mean	35.025	23.83	11.195	1.63695	1.1575
		n2 mean	34.31	25.43	8.88
	St 49 A	n1 mean	39.49	22.095	17.395	1.6016	1.1325
		n2 mean	37.51	22.38	15.13
	St 49 P	n1 mean	34.64	21.335	13.305	0.744015	0.429557
		n2 mean	34.135	21.765	12.37
		n3 mean	34.52	22.685	11.835
Fgf8	Treatment	Replicate number	Ct Fgf8	Ct Tubulin alpha	ΔCt (Ct of Fgf8 - Ct of Tubulin alpha)	SD	SEM
	St 46 A	n1 mean	33.07	24.265	8.805	0.72832	0.515
		n2 mean	30.46	22.685	7.775
	St 46 P	n1 mean	33.74	24.12	9.62	0.526795	0.3725
		n2 mean	31.715	22.84	8.875
	St 47 A	n1 mean	37.4	26.18	11.22	2.92389	2.0675
		n2 mean	34.37	27.285	7.085
	St 47 P	n1 mean	34.105	23.83	10.275	1.26572	0.895
		n2 mean	33.915	25.43	8.485
	St 49 A	n1 mean	33.73	22.095	11.635	3.68243	2.60387
		n2 mean	32.45	22.38	10.07
		n3 mean	29.77	25.15	4.62
	St 49 P	n1 mean	33.54	21.335	12.205	0.421466	0.243333
		n2 mean	33.24	21.765	11.475
		n3 mean	34.89	22.685	12.205
Gli3	Treatment	Replicate number	Ct Gli3	Ct Tubulin alpha	ΔCt (Ct of Gli3 - Ct of Tubulin alpha)	SD	SEM
	St 46 A	n1 mean	32.43	24.265	8.165	0.0707107	0.05
		n2 mean	30.95	22.685	8.265
	St 46 P	n1 mean	32.03	24.12	7.91	0.961665	0.68
		n2 mean	32.11	22.84	9.27
	St 47 A	n1 mean	34.21	26.18	8.03	1.6016	1.1325
		n2 mean	33.05	27.285	5.765
	St 47 P	n1 mean	31.26	23.83	7.43	0.367696	0.26
		n2 mean	33.38	25.43	7.95
	St 49 A	n1 mean	29.87	22.095	7.775	0.853039	0.603189
		n2 mean	29.25	22.38	6.87
		n3 mean	31.22	25.15	6.07
	St 49 P	n1 mean	29.09	21.335	7.755	2.30975	1.33353
		n2 mean	29.44	21.765	7.675
		n3 mean	34.4	22.685	11.715

## Sheet: Housekeeping genes for drug exp
House keeping genes for drug experiments
DMSO/SU5402
	Sample	CT	MEAN	Sample	CT	MEAN			Can GAPDH be used as internal control?
	DMSO GAPDH n1.1	13.41	13.12	SU5402 GAPDH n1.1	0	13.695				SU5402	DMSO
	DMSO GAPDH n1.2	13.07		SU5402 GAPDH n1.2	13.86				2^-Ct set 1	7.5404e-05	0.000112328
	DMSO GAPDH n1.3	12.88		SU5402 GAPDH n1.3	13.53				2^-Ct set 2	5.35038e-05	5.69478e-05
	DMSO GAPDH n2.1	13.54	14.1	SU5402 GAPDH n2.1	13.91	14.19			2^-Ct set 3	4.54089e-05	5.69478e-05
	DMSO GAPDH n2.2	13.7		SU5402 GAPDH n2.2	14.01				2^-Ct mean	5.81055e-05	7.54077e-05
	DMSO GAPDH n2.3	13.57		SU5402 GAPDH n2.3	14.65				fold change	0.770551
	DMSO GAPDH n3.1	12.31	14.1	SU5402 GAPDH n3.1	14.78	14.4267			Fold change is <2 so GAPDH can be used	-1.29777
	DMSO GAPDH n3.2	13.34		SU5402 GAPDH n3.2	14.4
	DMSO GAPDH n3.3	12.86		SU5402 GAPDH n3.3	14.1
Ethanol/cyclopamine
	Sample	CT	MEAN	Sample	CT	MEAN			Can RPL32 be used as internal control?
	Ethanol RPL32 n1.1	15.95	15.75	Cyclopamine RPL32 n1.1	16.08	15.71				Cyclopamine	Ethanol
	Ethanol RPL32 n1.2	15.47		Cyclopamine RPL32 n1.2	15.23				2^-Ct set 1	1.8656e-05	1.81459e-05
	Ethanol RPL32 n1.3	15.83		Cyclopamine RPL32 n1.3	15.82				2^-Ct set 2	2.1931e-05	1.78547e-05
	Ethanol RPL32 n2.1	16.02	15.7733	Cyclopamine RPL32 n2.1	15.71	15.4767			2^-Ct set 3	2.1184e-05	2.42778e-05
	Ethanol RPL32 n2.2	15.38		Cyclopamine RPL32 n2.2	15.19				2^-Ct mean	2.05903e-05	2.00928e-05
	Ethanol RPL32 n2.3	15.92		Cyclopamine RPL32 n2.3	15.53				fold change	1.02476
	Ethanol RPL32 n3.1	15.16	15.33	Cyclopamine RPL32 n3.1	16.2	15.5267			Fold change is <2 so RLP32 can be used	0.975837
	Ethanol RPL32 n3.2	15.17		Cyclopamine RPL32 n3.2	15.09
	Ethanol RPL32 n3.3	15.66		Cyclopamine RPL32 n3.3	15.29

## Sheet: DMSO Vs SU5402
Figure 5:
ETV1	Treatment	Replicate number	Ct Etv1	Ct GAPDH	ΔCt (Ct of Etv1 gene - Ct of GAPDH)	Mean ΔCt DMSO	ΔΔCt= ΔCt relative to mean ΔCt DMSO	2^-ΔΔCt
	DMSO	n1 mean	13.97	13.12	0.85	0.885556	-0.0355556	1.02495
		n2 mean	14.8433	14.1	0.743333		-0.142222	1.1036
		n3 mean	15.1633	14.1	1.06333		-0.177778	1.13114
	45uM SU5402	n1 mean	16.7	13.695	3.005		2.11944	0.230136
		n2 mean	16.8	14.19	2.61		1.72444	0.302615
		n3 mean	16.96	14.4267	2.53333		1.64778	0.319131
ETV4	Treatment	Replicate number	Ct Etv4	Ct GAPDH	ΔCt (Ct of Etv4 gene - Ct of GAPDH)	Mean ΔCt DMSO	ΔΔCt= ΔCt relative to mean ΔCt DMSO	2^-ΔΔCt
	DMSO	n1 mean	9.8	13.12	-3.32	-3.46667	0.146667	0.903335
		n2 mean	10.4933	14.1	-3.60667		-0.14	1.10191
		n3 mean	10.6267	14.1	-3.47333		0.00666667	0.99539
	45uM SU5402	n1 mean	11.5833	13.695	-2.11167		1.355	0.390935
		n2 mean	12.1533	14.19	-2.03667		1.43	0.371131
		n3 mean	12.1367	14.4267	-2.29		1.17667	0.442372
SHH	Treatment	Replicate number	Ct SHH	Ct GAPDH	ΔCt (Ct of SHH gene - Ct of GAPDH)	Mean ΔCt DMSO	ΔΔCt= ΔCt relative to mean ΔCt DMSO	2^-ΔΔCt
	DMSO	n1 mean	14.97	13.12	1.85	1.73111	0.118889	0.920897
		n2 mean	15.7883	14.1	1.68833		-0.0427778	1.0301
		n3 mean	15.755	14.1	1.655		0.0761111	0.948611
	45uM SU5402	n1 mean	17.2267	13.695	3.53167		1.80056	0.287064
		n2 mean	17.7	14.19	3.51		1.77889	0.291408
		n3 mean	17.08	14.4267	2.65333		0.922222	0.527696
PTCH1	Treatment	Replicate number	Ct PTCH1	Ct GAPDH	ΔCt (Ct of PTCH1 gene - Ct of GAPDH)	Mean ΔCt DMSO	ΔΔCt= ΔCt relative to mean ΔCt DMSO	2^-ΔΔCt
	DMSO	n1 mean	17.9367	13.12	4.81667	4.34111	0.475556	0.71919
		n2 mean	18.3567	14.1	4.25667		-0.0844444	1.06028
		n3 mean	18.05	14.1	3.95		0.391111	0.762542
	45uM SU5402	n1 mean	17.9667	13.695	4.27167		-0.0694444	1.04931
		n2 mean	18.2333	14.19	4.04333		-0.297778	1.22925
		n3 mean	18.19	14.4267	3.76333		-0.577778	1.49255
GREM1	Treatment	Replicate number	Ct GREM1	Ct GAPDH	ΔCt (Ct of GREM1 gene - Ct of GAPDH)	Mean ΔCt DMSO	ΔΔCt= ΔCt relative to mean ΔCt DMSO	2^-ΔΔCt
	DMSO	n1 mean	13.5467	13.12	0.426667	0.414444	0.0122222	0.991564
		n2 mean	14.3567	14.1	0.256667		-0.157778	1.11557
		n3 mean	14.66	14.1	0.56		-0.145556	1.10616
	45uM SU5402	n1 mean	16.33	13.695	2.635		2.22056	0.214559
		n2 mean	15.6433	14.19	1.45333		1.03889	0.486702
		n3 mean	15.3567	14.4267	0.93		0.515556	0.699524

## Sheet: Ethanol Vs Cyclopamine
Figure 6:
PTCH1	Treatment	Replicate number	Ct PTCH1	Ct RPL32	ΔCt (Ct of PTCH1 gene - Ct of RPL32)	Mean ΔCt DMSO	ΔΔCt= ΔCt relative to mean ΔCt DMSO	2^-ΔΔCt
	ETOH	n1 mean	18.4433	15.75	2.69333	2.65222	0.0411111	0.971906
		n2 mean	18.1167	15.7733	2.34333		-0.308889	1.23875
		n3 mean	18.25	15.33	2.92		-0.267778	1.20395
	CYCLOPAMINE	n1 mean	18.7733	15.71	3.06333		0.411111	0.752044
		n2 mean	18.6767	15.4767	3.2		0.547778	0.684073
		n3 mean	18.7	15.5267	3.17333		0.521111	0.696835
GREM1	Treatment	Replicate number	Ct GREM1	Ct RPL32	ΔCt (Ct of GREM1 gene - Ct of RPL32)	Mean ΔCt DMSO	ΔΔCt= ΔCt relative to mean ΔCt DMSO	2^-ΔΔCt
	ETOH	n1 mean	14.0833	15.75	-1.66667	-1.56889	-0.0977778	1.07012
		n2 mean	14.45	15.7733	-1.32333		0.245556	0.843491
		n3 mean	13.6133	15.33	-1.71667		0.147778	0.90264
	CYCLOPAMINE	n1 mean	16.0033	15.71	0.293333		1.86222	0.275052
		n2 mean	14.94	15.4767	-0.536667		1.03222	0.488956
		n3 mean	15.27	15.5267	-0.256667		1.31222	0.4027
FGF8	Treatment	Replicate number	Ct FGF8	Ct RPL32	ΔCt (Ct of FGF8 gene - Ct of RPL32)	Mean ΔCt DMSO	ΔΔCt= ΔCt relative to mean ΔCt DMSO	2^-ΔΔCt
	ETOH	n1 mean	13.2033	15.75	-2.54667	-2.25778	-0.288889	1.2217
		n2 mean	13.56	15.7733	-2.21333		0.0444444	0.969663
		n3 mean	13.3167	15.33	-2.01333		-0.244444	1.18464
	CYCLOPAMINE	n1 mean	15.6833	15.71	-0.0266667		2.23111	0.212995
		n2 mean	15.6267	15.4767	0.15		2.40778	0.188446
		n3 mean	15.2467	15.5267	-0.28		1.97778	0.253881
